# Supplementary material
Source: PubMed Central journal article supplement (PMC3879631)
Supplement: supp_M113.031377_mcp.M113.031377-1.pdf [file supp_M113.031377_mcp.M113.031377-1.pdf]

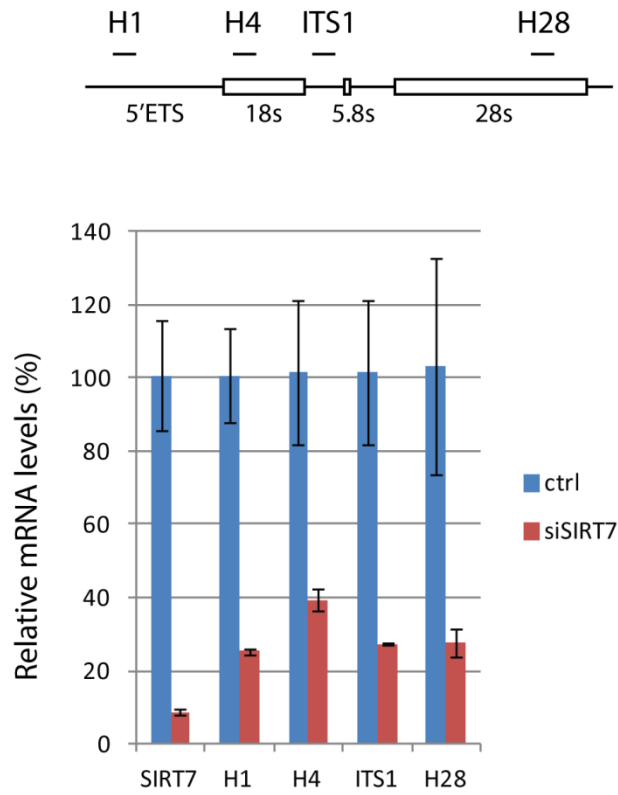

**Fig. S1. qPCR analysis of steady state levels of rRNA.** The primers selected, H1, H4, ITS1 and H28 are illustrated (top), and their levels were measured following knockdown of SIRT7 using siRNA #1 following 3 day treatment. Errors depict standard deviation (n=3).
